# Supplementary material for: Novel approaches to diagnosis and management of hereditary transthyretin amyloidosis
Source: PubMed Central journal article supplement — J Neurol Neurosurg Psychiatry. 2022 Mar 7;93(6):668–78. doi: 10.1136/jnnp-2021-327909 (PMC9148983; doi:10.1136/jnnp-2021-327909), 2022-03-07
Supplement: jnnp-2021-327909supp001.pdf [file jnnp-2021-327909supp001.pdf]

| Drug                           | Mechanism                       | Study                                                                                                                                                         | Intervention                                                                                                                             | Inclusion criteria                                                                                                                                 | Outcome                                                                                                                                                                                                                                                                                                                                      | Side effects                                                                                                                                                                  |
|--------------------------------|---------------------------------|---------------------------------------------------------------------------------------------------------------------------------------------------------------|------------------------------------------------------------------------------------------------------------------------------------------|----------------------------------------------------------------------------------------------------------------------------------------------------|----------------------------------------------------------------------------------------------------------------------------------------------------------------------------------------------------------------------------------------------------------------------------------------------------------------------------------------------|-------------------------------------------------------------------------------------------------------------------------------------------------------------------------------|
| Diflunisal                     | TTR tetramer stabiliser (NSAID) | <a href="#">NCT00294671</a><br>Phase 3 Double-blinded Placebo-controlled RCT<br>N=130<br>1:1 allocation                                                       | 250mg bd PO for 24 months<br><br>(with PPI)                                                                                              | - 18-75y.o.<br>- ATTRv-PN<br>- Biopsy proven amyloidosis<br>- Signs of PN or AN<br>- ECOG <3<br>- NYHA<4                                           | 1°: 29.7% diflunisal vs. 9.4% placebo showed reduced rate of neurologic progression (NIS+7) and improved QOL (SF-36) over 2 years                                                                                                                                                                                                            | Upper GIT ulceration and GORD<br>Renal impairment<br>Platelet aggregation inhibition and bleeding<br>Hypertension<br>Fluid retention<br>Monitor FBC and EUC 3/12<br>PPI cover |
| Tafamidis (Vyndagel; Vyndamax) | TTR tetramer stabiliser         | Fx-005 Phase 2/3 Double-blinded Placebo-controlled RCT<br><a href="#">NCT00409175</a><br>N= 128<br><br>OLE- 30 months<br><a href="#">NCT00791492</a><br>N= 86 | 20mg PO daily for 18 months                                                                                                              | - 18-75y.o.<br>- ATTRV30M - PN<br>- Biopsy confirmed<br>- KPS >50%<br><br>(Findings subsequently confirmed in non-V30M mutations)                  | Fx-005<br>- No difference in NIS-LL or NF-QoL-DN responder on IIT<br>- EE cohort:60% NIS-LL responders vs 38% placebo; improved NF-QoL-DN OLE<br>- Stabilisation of NIS-LL and NF-QoL-DN<br>- Rate of change of NIS-LL reduced in patients switching from placebo<br>Tafamidis 30/12 56% greater preservation of NIS-LL than late initiation | No difference in AE between Tafamidis and placebo<br><br>No monitoring required                                                                                               |
|                                |                                 | ATTR-ACT<br><a href="#">NCT01994889</a><br>Phase 3, Double-blinded, Placebo-controlled RCT<br>N=441<br>2:1:2 allocation (80mg: 20mg: placebo)                 | Tafamidis meglumine/ Vyndagel: 80mg daily or 20mg daily PO for 30 months<br><br>Note: Tafamidis (free acid form)/ Vyndamax 61mg PO daily | - 18-90 y.o.<br>- ATTR-CM (v and wt)<br>- HF symptoms or prior hospitalisation<br>- IVSd >12mm<br>- Biopsy or scintigraphy proven ATTR amyloidosis | 1°: Tafamidis showed lower all-cause mortality vs placebo 29.5% vs 42.9%<br>2°: Cardiovascular-related hospitalisations were reduced RR of 0.68 (0.48 per year vs. 0.70 per year). Except in NYHA class III where hospitalisations > placebo<br>Reduced 6-MWT and KCCQ in Tafamidis vs controls<br>NNT -4                                    |                                                                                                                                                                               |
| Acoramadis (AG10/ ALXN2060)    | TTR tetramer stabiliser         | ATTRibute-CM<br><a href="#">NCT03860935</a><br>Phase 3 Double-                                                                                                | 800mg PO bd for 30 months                                                                                                                | - 18-90 y.o.<br>- ATTR-CM (v and wt)<br>- HF symptoms or prior hospitalisation<br>- Stable NYHA I-III                                              | Estimated completion May 2023<br>1°: 6MWT at M12, Composite all-cause                                                                                                                                                                                                                                                                        | No known SE or interactions                                                                                                                                                   |

|                                                |                                            |                                                                                                                                       |                                                                                             |                                                                                                                                                                                                                                       |                                                                                                                                                                                                                                               |                                                                                                                                                                                                                                                                                                                                                                                     |
|------------------------------------------------|--------------------------------------------|---------------------------------------------------------------------------------------------------------------------------------------|---------------------------------------------------------------------------------------------|---------------------------------------------------------------------------------------------------------------------------------------------------------------------------------------------------------------------------------------|-----------------------------------------------------------------------------------------------------------------------------------------------------------------------------------------------------------------------------------------------|-------------------------------------------------------------------------------------------------------------------------------------------------------------------------------------------------------------------------------------------------------------------------------------------------------------------------------------------------------------------------------------|
|                                                |                                            | blinded<br>Placebo<br>controlled<br>RCT<br>N = 632<br>2:1 allocation                                                                  |                                                                                             | <ul style="list-style-type: none"> <li>- &gt;150m 6MWT</li> <li>- IVSd &gt;12mm</li> <li>- Biopsy or scintigraphy</li> </ul>                                                                                                          | mortality, and CV hospitalisations at 30mo<br>2°: KCCQ M12 and M30, 6MWT M30, All-cause and CV mortality and CV hospitalisation. Phase 2- N 49: near-complete stabilisation of TTR (>90% at D28)<br>Prelim results M12: no difference in 6MWT |                                                                                                                                                                                                                                                                                                                                                                                     |
|                                                |                                            | ATTRibute-PN<br><a href="#">NCT04882735</a><br>Phase 3<br>Open-label<br>Single-arm<br>N=100                                           | 800mg PO bd for 18 months                                                                   | <ul style="list-style-type: none"> <li>- 18-90 y.o.</li> <li>- ATTRv-PN</li> <li>- PND&lt;IIIb</li> <li>- NIS 5-130</li> <li>- NCS sum score &gt;2</li> <li>- KPS&gt;60%</li> </ul>                                                   | Not yet Recruiting<br>1°: Change from baseline mNIS+7; safety<br>2°: Change in NFQoL-DN, mBMI, COMPASS-31at M18                                                                                                                               |                                                                                                                                                                                                                                                                                                                                                                                     |
| Green Tea Extract (EGCG)                       | TTR resorption                             | Case cohort<br>N=25                                                                                                                   | 600mg PO daily for up to 12 months                                                          | <ul style="list-style-type: none"> <li>- ATTRwt</li> <li>- Endomyocardial biopsy positive</li> <li>- Gene testing negative</li> </ul>                                                                                                 | 1°: 12 out of 14 showed a decrease of 5.9% in left ventricular myocardial mass on cMR                                                                                                                                                         | Liver function derangement (rare liver failure).<br>Insomnia                                                                                                                                                                                                                                                                                                                        |
| Doxycycline and TUDCA                          | TTR synthesis inhibitor and TTR resorption | Phase 2,<br>Single-centre,<br>Open-label,<br>non-randomised<br><a href="#">NCT01171859</a> and<br><a href="#">NCT01855360</a><br>N=40 | Doxycycline 100mg PO bd and TUDCA 250mg PO tds for 12 months                                | <ul style="list-style-type: none"> <li>- &gt;18 y.o</li> <li>- ATTRwt and ATTRv</li> <li>- Biopsy proven ATTR</li> <li>- Symptomatic organ involvement</li> <li>- ECOG&lt;3</li> <li>- NYHA&lt;3</li> <li>- SBP&gt;100mmHg</li> </ul> | Stable neuropathy in 46% (n=13 evaluable patients)<br>Stable NTproBNP in 75% (n=24 evaluable patients).                                                                                                                                       | Doxycycline:<br>Photosensitive skin reactions<br>GIT side effects.<br><br>TUDCA: no significant AE                                                                                                                                                                                                                                                                                  |
| Inotersen (Tegsedi, IONIS-TTR Rx, ISIS 420915) | ASO                                        | NEURO-TTR<br><a href="#">NCT01737398</a><br>Phase 2/3<br>Double-blinded,<br>Placebo-controlled<br>RCT<br>N=172<br>2:1 allocation      | 300mg SC x 3 in W1, followed by 300mg SC weekly for 16 months<br><br>(+3000IU Vitamin A OD) | <ul style="list-style-type: none"> <li>- 18-82 y.o.</li> <li>- ATTRv-PN</li> <li>- biopsy confirmed ATTR</li> <li>- NIS 10-130</li> <li>- PND &lt;3</li> <li>- KPS &gt;50</li> <li>- NYHA&lt;3</li> </ul>                             | 1°: Improvement or non-progression in polyneuropathy (mNIS+7) 37%<br>Inotersen vs 19% placebo.<br>Improvement or non-progression in NF-QoL-DN 50% vs 27%                                                                                      | SAE:<br>- Glomerulonephritis 3%<br>- Severe thrombocytopenia (<25,000mm <sup>3</sup> ) 3% including 1 death due to ICH due to grade 4 thrombocytopenia<br>Mild-Mod AE<br>- Thrombocytopenia (<140,000mm <sup>3</sup> ) in 54% vs 13% placebo<br>- Infusion/injection reactions<br>Vitamin A Deficiency<br><b>Monitor:</b> EUC, FBC, Urine analysis 2 weekly<br>Supplement Vitamin A |
|                                                |                                            | <a href="#">NCT03702829</a><br>Phase 2<br>Open-label<br>N=50                                                                          | 300mg SC weekly for 24 months<br><br>(+3000IU Vitamin A OD)                                 | <ul style="list-style-type: none"> <li>-18-85 y.o</li> <li>- ATTR-CM (v or wt)</li> <li>- either biopsy or DPD positive</li> <li>- stable NYHA I-III</li> </ul>                                                                       | Estimated completion March 2022<br>1°: LV strain compared with baseline at M6<br>2°: LV strain compared with baseline at M12, M18, M24, cMR extracellular volume at M6, M12, M24                                                              |                                                                                                                                                                                                                                                                                                                                                                                     |
| Eplontersen                                    | ASO                                        | Neuro-                                                                                                                                | 45mg SC                                                                                     | - 18-82y.o.                                                                                                                                                                                                                           | Estimated                                                                                                                                                                                                                                     | Vitamin A Deficiency                                                                                                                                                                                                                                                                                                                                                                |

|                                            |                                  |                                                                                                                                                      |                                                                                                                                                                                                         |                                                                                                                                                                                                                                                                                                    |                                                                                                                                                                                                                                                                  |                                                                                                                                                                                                          |
|--------------------------------------------|----------------------------------|------------------------------------------------------------------------------------------------------------------------------------------------------|---------------------------------------------------------------------------------------------------------------------------------------------------------------------------------------------------------|----------------------------------------------------------------------------------------------------------------------------------------------------------------------------------------------------------------------------------------------------------------------------------------------------|------------------------------------------------------------------------------------------------------------------------------------------------------------------------------------------------------------------------------------------------------------------|----------------------------------------------------------------------------------------------------------------------------------------------------------------------------------------------------------|
| (AKCEA-TTR-LRx, IONIS-TTR-LRx, ION-682884) | conjugated to GaINAc             | TTRtransform <a href="#">NCT04136184</a><br>Phase 3<br>Open-label<br>Crossover<br>study<br>RCT<br>N=168                                              | every 4 weeks<br>for 65 weeks<br>(vs Inotersen<br>SC weekly)<br><br>(+3000IU<br>Vitamin A<br>OD)                                                                                                        | - ATTRv-PN<br>- Coutinho 1-2<br>- NIS 10-130                                                                                                                                                                                                                                                       | completion Jan<br>2024<br>1 <sup>o</sup> : Change in<br>mNIS+7 and<br>NF-QoL-DN at<br>W66, change in<br>TTR serum<br>concentrations<br>2 <sup>o</sup> : Change in<br>mNIS+7, NF-<br>QOL-DN at<br>W35, SF-36,<br>PND and mBMI<br>at W65.                          | Supplement Vitamin A                                                                                                                                                                                     |
|                                            |                                  | Cardio-TTRtransform <a href="#">NCT04136171</a><br>Phase 3<br>Double-Blinded<br>Placebo-controlled<br>RCT<br>Ongoing<br>enrolment<br>estimated N=750 | 45mg SC<br>every 4 weeks<br><br>(+3000IU<br>Vitamin A<br>OD)                                                                                                                                            | - 18-90 y.o.<br>- ATTR-CM<br>- Biopsy or Bone<br>scintigraphy<br>confirmed ATTR<br>- NYHA I-III<br>- IVSd >12mm                                                                                                                                                                                    | Estimated<br>completion June<br>2024<br>1 <sup>o</sup> : Composite<br>of CV mortality<br>and recurrent<br>CV clinical<br>events at M30<br>2 <sup>o</sup> : Change in<br>baseline 6MWT,<br>KCCQ, CV<br>mortality, CV<br>events, All-<br>cause mortality<br>at M30 |                                                                                                                                                                                                          |
| Patisiran<br>(Onpattro,<br>ALN-TTR02)      | siRNA                            | APOLLO <a href="#">NCT01960348</a><br>Phase 3,<br>Double-<br>blinded,<br>Placebo-<br>controlled,<br>RCT<br>N=225<br>2:1 allocation                   | 0.3mg/kg IVI,<br>3 weekly<br>(max 30mg)<br>for 18 months<br><br>(+3000IU<br>Vitamin A<br>OD and<br>infusion<br>premedication<br>s – IV steroid,<br>paracetamol,<br>H1- and H2-<br>receptor<br>blockers) | - 18-85 y.o.<br>- ATTRv-PN<br>- NIS: 5-130<br>- PND <IIB<br>- NYHA<3                                                                                                                                                                                                                               | 1 <sup>o</sup> :<br>Improvement or<br>less progression<br>in<br>polyneuropathy<br>scores<br>(mNIS+7) in<br>56% vs 4%<br>2 <sup>o</sup> :<br>Improvements<br>in NFQoL-DN,<br>10-MWT, NIS,<br>mBMI, R-ODS<br>and<br>COMPASS31<br>scores.                           | SAE: similar between<br>Patisiran and placebo<br>Mild-Mod AE:<br>- Peripheral oedema<br>20% vs 22%<br>- Infusion-related<br>reactions (19% vs<br>9%)<br>Vitamin A Deficiency<br><br>Supplement Vitamin A |
|                                            |                                  | APOLLO-B <a href="#">NCT03997383</a><br>Phase 3,<br>Double-<br>blinded,<br>Placebo-<br>controlled,<br>RCT<br>N=360                                   | 0.3mg/kg IVI,<br>3 weekly for<br>12 months<br><br>(+3000IU<br>Vitamin A<br>OD and<br>infusion<br>premedication<br>s – IV steroid,<br>paracetamol,<br>H1- and H2-<br>receptor<br>blockers)               | - 18-85 y.o.<br>- ATTR-CM (v or wt)<br>- HF symptoms or<br>prior hospitalisation<br>- Stable HF (no<br>hospitalisation in<br>6/52)<br>- Tafamidis naive, or<br>progression on<br>Tafamidis >6/12<br>- >150m on 6MWT<br>- NTproBNP >300ng/<br>L and <8500ng/L or<br>if AF >600ng/L and<br><8500ng/L | Estimated<br>completion June<br>2025.<br>Outcome<br>measures:<br>1 <sup>o</sup> : Change in<br>6MWT from<br>baseline to 12<br>mo<br>2 <sup>o</sup> : Change in<br>KCCQ score,<br>All-Cause<br>mortality, CV<br>events                                            |                                                                                                                                                                                                          |
| Vutisiran<br>(ALN-TTRSC02)                 | siRNA<br>conjugated<br>to GaINAc | HELIOS-A <a href="#">NCT03759379</a><br>Phase 3,<br>Open-label,<br>RCT<br>N=164<br>3:1 allocation                                                    | 25mg SC<br>every 12<br>weeks<br>(vs Patisiran<br>IV and<br>Placebo<br>cohort from<br>APOLLO)<br>for 18 months<br><br>(+ 3000 IU<br>Vitamin A<br>daily)                                                  | - 18-85 y.o.<br>- ATTRv-PN<br>- NIS 5-130<br>- PND <IIB<br>- KPS>60%                                                                                                                                                                                                                               | Estimated<br>completion May<br>2024<br>1 <sup>o</sup> : Change in<br>mNIS+7 at 9<br>months<br>2 <sup>o</sup> : Change in<br>NF QoL-DN,<br>10-MWT at M9,<br>Change in<br>m+NIS, NF<br>QoL-DN, 10-<br>MWT, mBMI,                                                   | Mild-Mod AE<br>- Injection site<br>reactions<br>Vitamin A Deficiency<br>Supplement Vit A                                                                                                                 |

|                                                                  |                           |                                                                                                                                        |                                                                                                  |                                                                                                                                                                                                                                            |                                                                                                                                                                                                                               |                                                                                      |
|------------------------------------------------------------------|---------------------------|----------------------------------------------------------------------------------------------------------------------------------------|--------------------------------------------------------------------------------------------------|--------------------------------------------------------------------------------------------------------------------------------------------------------------------------------------------------------------------------------------------|-------------------------------------------------------------------------------------------------------------------------------------------------------------------------------------------------------------------------------|--------------------------------------------------------------------------------------|
|                                                                  |                           |                                                                                                                                        |                                                                                                  |                                                                                                                                                                                                                                            | R-ODS at M18 Interim 9/12 reporting: improved mNIS+7, NF QoL-DN, and stability of 10-MWT, NTproBNP c/w Placebo                                                                                                                |                                                                                      |
|                                                                  |                           | HELIOS-B<br><a href="#">NCT04153149</a><br>Phase 3 Double-blinded, Placebo-controlled RCT<br>N= 665                                    | 25mg SC every 12 weeks<br><br>(+ 3000 IU Vitamin A daily)                                        | - 18-85 y.o.<br>- ATTR-CM (v or wt)<br>- HF symptoms or prior hospitalisation                                                                                                                                                              | Estimated completion June 2025<br>Outcome measures:<br>1°: Composite outcome of all-cause mortality and recurrent CV hospitalisations at 30-36mo<br>2°: Change in 6MWT, KCCQ score, LVWT, GLS, mortality, CV events, NTProBNP |                                                                                      |
| CRISPR-Cas9 gene editing (NTLA-2001)                             | TTR gene editing          | <a href="#">NCT04601051</a><br>Phase 1 Open-label, single ascending dose followed by single dose expansion Ongoing recruitment<br>N=74 | 0.1mg/kg and 0.3mg/kg single dose IV                                                             | - 18-80 y.o.<br>- Weight 50-90kg<br>- Lack of access to approved treatments for ATTR<br>ATTRv-PN<br>- No other cause of neuropathy<br>OR<br>ATTR-CM (v or wt)<br>- NYHA I-III<br>- HF symptoms or prior hospitalisation<br>- >150m on 6MWT | Estimated completion Nov 2024<br><br>Initial dosing groups n=6:<br>- Durable knock out of TTR after single dose<br>- 0.1mg/kg – 52% and 0.3mg/kg – 87% reduction in TTR concentration at D28                                  | SAE: Nil<br>Mild AE<br>- Infusion reaction<br>- Increased D-dimer                    |
| PRX-004 (monoclonal antibody to misfolded TTR)                   | Amyloid deposit clearance | Phase 1 Open-label Dose-escalation<br><a href="#">NCT03336580</a><br>N=21                                                              | IV every 28 days                                                                                 | - >18 y.o.<br>- ATTR biopsy, genetics, scintigraphy proven<br>- KPS>60%<br>- NTproBNP >650 and <5000pg/mL or IVSd >12mm                                                                                                                    | Terminated due to COVID<br>Dose escalation study to determine safety, tolerability, PK and PD.                                                                                                                                | TBD                                                                                  |
| NI006 (monoclonal antibody to misfolded TTR)                     | Amyloid deposit clearance | Phase 1 Double-blinded, Placebo-controlled Dose-escalation RCT<br><a href="#">NCT04360434</a><br>N=36                                  | IV every 28 days                                                                                 | - >18 y.o.<br>- ATTR-CM (v or wt)<br>- LVEF>40%, LVWT>14mm, NTproBNP >600pg/mL, 6MWT>150m<br>- Stability over 30days<br>- KPS>60%                                                                                                          | Estimated completion June 2022<br>Dose escalation study to determine safety, tolerability, PK and PD.                                                                                                                         | TBD                                                                                  |
| Anti-SAP monoclonal antibody (Dezamizumab) and CPHPC (Miridesap) | Deposit elimination       | Phase 2 Open-Label Non-randomised<br><a href="#">NCT03044353</a><br>N=7                                                                | CPHPC 20mg/hr IV daily for 3 d then anti-SAP antibody D1 and D3 IV, with 60mg CPHPC SC TDS D1-11 | - 18-80 y.o.<br>- ATTR-CM (v or wt) – biopsy, genetics or scintigraphy proven<br>- LGE on cMR<br>- LV Mass on cMR> 200g<br>- Stable NYHA 2-3                                                                                               | Study Terminated due to change in benefit/risk profile<br>1°: Safety and efficacy, change in LV Mass                                                                                                                          | In Phase 1 (n=23; <a href="#">NCT01777243</a> ) self-limiting rash with higher doses |

**Table 1:** Clinical trials in ATTR amyloidosis.

Abbreviations: 6MWT = 6 minute walk test; 10-MWT = 10m walk test; ADL=activities of daily living, AE = adverse events; AN = Autonomic neuropathy; ASO= antisense oligonucleotide, ATTRv= variant (hereditary) transthyretin amyloidosis, bd = bi-daily; cMR = cardiac MRI; COMPASS-31 = Composite Autonomic Symptom Score; CV = cardiovascular; c/w = compared with; D = Day; ECOG = Eastern Cooperative Oncology Group; EUC = Kidney function test; EE = efficacy-evaluable population; FBC= Full blood count; GaINAc = N-acetyl galactosamine; GIT = Gastrointestinal; GLS = Global longitudinal strain; GORD= gastro-oesophageal reflux disease; HF= Heart failure; IVI=intravenous infusion; IIT = intention to treat; IVSd = Interventricular septal diameter; KCCQ = Kansas City Cardiomyopathy questionnaire; KPS = Karnofsky Performance scale; LGE = Late gadolinium enhancement; LV = Left ventricular; LVEF = left ventricular ejection fraction; LVWT= Left-ventricular wall thickness; M = Month; mBMI = modified BMI; mNIS+7=modified Neuropathy Impairment Scale+7; N = number of participants; NF-QoL-DN= Norfolk Quality of Life-Diabetic Neuropathy questionnaire; NIS-LL= neuropathy Impairment Score lower limb subscale; NNT = number needed to treat; NSAID = non-steroidal anti-inflammatory drug; NYHA = New York Heart Association; OLE = Open-label extension; PD = Pharmacodynamics; PK = Pharmacokinetics; PN = Peripheral neuropathy; PND = polyneuropathy disability score; PO = per-oral; PPI = proton-pump inhibitor; QOL = quality of life; RCT= randomized controlled trial; R-ODS = Rasch-built overall disability scale; RR = relative risk; SAE= serious adverse events, SAP = serum amyloid P; SC = subcutaneous, SF-36 = 36-Item Short Form Health Survey; siRNA= small interfering RNA; TBD = To be determined; TDS = Three times daily; W = Week.
